# Supplementary material for: Association of common variation in ADD3 and GPC1 with biliary atresia susceptibility
Source: publisher site journal article supplement (doi:10.18632/aging.103067), 2020-04-21
Supplement: Supplementary file [file aging-v12i8-103067-supplementary-material-SD2.pdf]

## SUPPLEMENTARY TABLES

**Supplementary Table 1. Allele frequencies of four Tag SNPs of *EFEMP1* in Europeans and Chinese.**

|            | Alleles | Risk allele | Risk allele frequency |          | Ethnic group | Study                |
|------------|---------|-------------|-----------------------|----------|--------------|----------------------|
|            |         |             | cases                 | controls |              |                      |
| rs1346786  | T/C     | T           | 0.39                  | 0.29     | Europeans    | Chen Y, 2018, stage1 |
|            |         |             | 0.35                  | 0.30     | Europeans    | Chen Y, 2018, stage2 |
|            |         |             | 0.88                  | 0.86     | Chinese      | Present study        |
| rs11125609 | C/T     | C           | 0.36                  | 0.28     | Europeans    | Chen Y, 2018, stage1 |
|            |         |             | 0.31                  | 0.29     | Europeans    | Chen Y, 2018, stage2 |
|            |         |             | 0.56                  | 0.54     | Chinese      | Present study        |
| rs10865291 | A/G     | A           | 0.43                  | 0.33     | Europeans    | Chen Y, 2018, stage1 |
|            |         |             | 0.40                  | 0.32     | Europeans    | Chen Y, 2018, stage2 |
|            |         |             | 0.80                  | 0.78     | Chinese      | Present study        |
| rs1430193  | T/A     | T           | 0.44                  | 0.34     | Europeans    | Chen Y, 2018, stage1 |
|            |         |             | 0.42                  | 0.33     | Europeans    | Chen Y, 2018, stage2 |
|            |         |             | 0.09                  | 0.09     | Chinese      | Present study        |

**Supplementary Table 2. Number of accounted risk alleles in BA cases and controls and ORs for BA by cumulative risk alleles.**

| Number of risk alleles | Control | Case  | OR(95%CI)       | P value  |
|------------------------|---------|-------|-----------------|----------|
| 0                      | 14.6%   | 9.0%  | 1               |          |
| 1                      | 32.9%   | 24.9% | 1.23(0.79,1.91) | 3.71E-01 |
| 2                      | 34.9%   | 40.5% | 1.88(1.23,2.87) | 3.61E-03 |
| 3                      | 15.2%   | 21.6% | 2.30(1.45,3.65) | 4.01E-04 |
| 4                      | 2.5%    | 3.9%  | 2.56(1.23,5.32) | 1.20E-02 |

OR: odds ratio; CI: confidence interval.

**Supplementary Table 3. Functional annotation of SNPs correlated with newly identified risk variants using data from HaploReg v4.1.**

| SNP        | Position  | Promoter histone marks <sup>b</sup> | Enhancer histone marks <sup>c</sup> | DNase <sup>d</sup> | Proteins bound <sup>e</sup> | Motifs changed <sup>f</sup> |
|------------|-----------|-------------------------------------|-------------------------------------|--------------------|-----------------------------|-----------------------------|
| rs6750380  | 241362669 |                                     | ESDR, CRVX                          |                    | JUND, FOSL2                 |                             |
| rs6707262  | 241371065 |                                     | 4 tissues                           |                    |                             | 5 altered motifs            |
| rs17095355 | 111735750 |                                     | 11 tissues                          | 5 tissues          |                             | Hoxa5, XBP-1                |
| rs10509906 | 111757674 |                                     |                                     | ESDR               |                             | Ets, Gfi1, Gfi1b            |
| rs2501577  | 111846687 | BLD                                 | 7 tissues                           | IPSC, BLD, BLD     |                             | BDP1, TBX5                  |

SNP: Single Nucleotide Polymorphism; The chromosome position (bp) is based on GRCH37;

ESDR: H9 Derived Neuronal Progenitor Cultured Cells or H9 Derived Neuron Cultured Cells; CRVX: HeLa-S3 Cervical Carcinoma Cell Line; IPSC: iPS DF 6.9 Cells; BLD: Primary T cells from peripheral blood or Primary Natural Killer cells from peripheral blood.

b. Evidence of local H3K4Me1 and H3K27Ac modification (cell lines/types: if >3, only the number is included).

c. Evidence of local H3K4Me3 modification (cell lines/types: if >3, only the number is included).

d. Evidence of chromatin hypersensitivity to DNase (cell lines/types: if >3, only the number is included).

e. ChIP-seq experiments indicate alteration in binding of transcription factor (if >3, only the number is included).

f. Evidence of alteration in regulatory motif (if >3, only the number is included).
